# Supplementary material for: Differential Proteome Analysis of a Flor Yeast Strain under Biofilm Formation
Source: Int J Mol Sci. 2017 Mar 28;18(4):720. doi: 10.3390/ijms18040720 (PMC5412306; doi:10.3390/ijms18040720)
Supplement: Supplementary file 1 [file ijms-18-00720-s001.xlsx]

## Sheet: Hoja1
Protein standard name	Uniprot Accession number	Gene	Brief description	Observable peptides (400-1500 Da)	Score		Observed peptides		PAI		EmPAI		Protein content (mol%)			Cellular component	Biological process	Metabolic pathway
					BFC	NBFC	BFC	NBFC	BFC	NBFC	BFC	NBFC	BFC	NBFC	BFC/NBFC
Aat2p	P23542	AAT2	Cytosolic aspartate aminotransferase	381	83.8	3.3	12	2	0.0	0.0	0.1	0.0	0.4	0.1	6.5	Cytosol; peroxisome	2-oxoglutarate metabolic process; aspartate biosynthetic process; aspartate metabolic process; glutamate metabolic process; l-aspartate:2-oxoglutarate aminotransferase activity; l-phenylalanine:2-oxoglutarate aminotransferase activity	Asparagine biosynthesis; asparagine degradation; aspartate biosynthesis; superpathway of threonine biosynthesis
Abf1p	P14164	ABF1	DNA binding protein with possible chromatin-reorganizing activity	682		5.3		2		0.0		0.0		0.0	0.0	Nucleotide-excision repair factor 4 complex; nucleus	Chromatin remodeling; chromatin silencing at silent mating-type cassette; dna-dependent dna replication; global genome nucleotide-excision repair; negative regulation of transcription from rna polymerase ii promoter; positive regulation of transcription from rna polymerase ii promoter; rna polymerase ii core promoter proximal region sequence-specific dna binding transcription factor activity invo…
Acb1p	P31787	ACB1	Acyl-CoA-binding protein, transports newly synthesized acyl-CoA ester	92	2.0	84.1	1	15	0.0	0.2	0.0	0.5	0.1	2.1	0.1	Extracellular region	Chronological cell aging; long-chain fatty acid transport; long-chain fatty acid transporter activity
Aco1p	P19414	ACO1	Aconitase	795	180.2		24		0.0		0.1		0.4		-	Cytosol; mitochondrial intermembrane space; mitochondrial matrix; mitochondrial nucleoid	Aconitate hydratase activity; mitochondrial genome maintenance; tricarboxylic acid cycle	Glyoxylate cycle; superpathway of tca cycle and glyoxylate cycle; tca cycle, aerobic respiration
Aco2p	P39533	ACO2	Putative mitochondrial aconitase isozyme	715		5.0		2		0.0		0.0		0.0	0.0	Mitochondrion	Aconitate hydratase activity; lysine biosynthetic process via aminoadipic acid; tricarboxylic acid cycle	TCA cycle, aerobic respiration
Ade3p	P07245	ADE3	Cytoplasmic trifunctional enzyme C1-tetrahydrofolate synthase	840	102.6	11.6	16	3	0.0	0.0	0.0	0.0	0.2	0.0	5.7	Cytoplasm; nucleus	Folic acid-containing compound biosynthetic process; folic acid-containing compound metabolic process; formate-tetrahydrofolate ligase activity; histidine biosynthetic process; methenyltetrahydrofolate cyclohydrolase activity; methionine biosynthetic process;methylenetetrahydrofolate dehydrogenase (nadp+) activity;purine nucleobase biosynthetic process; purine nucleotide biosynthetic process; tet…	Pathways of chorismate; folate biosynthesis; folate polyglutamylation
Adh2p	P00331	ADH2	Glucose-repressible alcohol dehydrogenase II	292	8.91241		4		0.0136986		0.032045		0.155998			Cytoplasm	Amino acid catabolic process to alcohol via Ehrlich pathway; ethanol metabolic process; NADH oxidation; oxidation-reduction process	Glucose fermentation; tryptophan degradation; valine degradation; isoleucine degradation; leucine degradation; phenylalanine degradation; ethanol degradation
Agx1p	P43567	AGX1	Alanine:glyoxylate aminotransferase (AGT)	304	10.7175		2		0.00657895		0.0152639		0.0743063			Mitochondrion; peroxisome	Glycine biosynthetic process; glycine biosynthetic process, by transamination of glyoxylate	Glycine biosynthesis from glyoxylate; superpathway of serine and glycine biosynthesis
Ald4p	P46367	ALD4	Mitochondrial aldehyde dehydrogenase, required for growth on ethanol	451	3.9		2		0.0		0.0		0.0		-	Mitochondrial nucleoid; mitochondrion	Acetate biosynthetic process; aldehyde dehydrogenase (nad) activity; aldehyde dehydrogenase [nad(p)+] activity; ethanol metabolic process; nadph regeneration; pyruvate metabolic process	Glucose fermentation
Ald6p	P54115	ALD6	Cytosolic aldehyde dehydrogenase	388	1.2	49.5	1	19	0.0	0.0	0.0	0.1	0.0	0.6	0.1	Cytosol; mitochondrion	Acetate biosynthetic process; aldehyde dehydrogenase (nadp+) activity; aldehyde dehydrogenase [nad(p)+] activity; ethanol catabolic process; nadph regeneration; response to salt stress	Glucose fermentation
Arg1p	P22768	ARG1	Arginosuccinate synthetase	364	34.2	9.0	10	5	0.0	0.0	0.1	0.0	0.3	0.1	2.1	Cytosol	Arginine biosynthetic process; argininosuccinate synthase activity	Arginine biosynthesis
Arg4p	P04076	ARG4	Argininosuccinate lyase	464		2.2		1		0.0		0.0		0.0	0.0	Cytosol	Arginine biosynthetic process via ornithine; argininosuccinate lyase activity	Arginine biosynthesis
Arg7p	Q04728	ARG7	Mitochondrial ornithine acetyltransferase	350	39.6	11.6	8	4	0.0	0.0	0.1	0.0	0.3	0.1	2.1	Mitochondrial matrix	Acetyl-coa:l-glutamate n-acetyltransferase activity; arginine biosynthetic process; glutamate n-acetyltransferase activity; ornithine biosynthetic process	Arginine biosynthesis
Arg8p	P18544	ARG8	Acetylornithine aminotransferase	440		4.4		1		0.0		0.0		0.0	0.0	Mitochondrial matrix	Arginine biosynthetic process; n2-acetyl-l-ornithine:2-oxoglutarate 5-aminotransferase activity; ornithine biosynthetic process	Arginine biosynthesis
Aro2p	P28777	ARO2	Bifunctional chorismate synthase and flavin reductase	377	14.1085		3		0.00795756		0.0184919		0.0900202			Cytoplasm	Aromatic amino acid family biosynthetic process; cellular amino acid biosynthetic process; chorismate biosynthetic process	Pathways of chorismate; chorismate biosynthesis; superpathway of phenylalanine, tyrosine and tryptophan biosynthesis
Aro3p	P14843	ARO3	3-deoxy-D-arabino-heptulosonate-7-phosphate (DAHP) synthase	387		2.53382		1		0.00258398		0.00596757		0.0278505		Cytoplasm; mitochondrion; nucleus	Aromatic amino acid family biosynthetic process; biosynthetic process; cellular amino acid biosynthetic process; chorismate biosynthetic process	Pathways of chorismate; chorismate biosynthesis; superpathway of phenylalanine, tyrosine and tryptophan biosynthesis
Aro4p	P32449	ARO4	3-deoxy-D-arabino-heptulosonate-7-phosphate (DAHP) synthase	284	110.794	2.52673	13	1	0.0457746	0.00352113	0.111155	0.00814065	0.541114	0.0379922		Cytoplasm; nucleus	Aromatic amino acid family biosynthetic process; biosynthetic process; cellular amino acid biosynthetic process; chorismate biosynthetic process	Pathways of chorismate; chorismate biosynthesis; superpathway of phenylalanine, tyrosine and tryptophan biosynthesis
Aro8p	P53090	ARO8	Aromatic aminotransferase I	412		7.15716		4		0.00970874		0.0226069		0.105506		Cytoplasm	Aromatic amino acid family metabolic process; biosynthetic process; L-methionine biosynthetic process from methylthioadenosine; L-phenylalanine biosynthetic process; lysine biosynthetic process via aminoadipic acid; tyrosine biosynthetic process	Pathways of chorismate; superpathway of phenylalanine, tyrosine and tryptophan biosynthesis; tryptophan degradation; superpathway of methionine salvage pathway; tyrosine degradation; phenylalanine degradation; tyrosine biosynthesis; phenylalanine biosynthesis; methionine salvage pathway
Asf1p	P32447	ASF1	Nucleosome assembly factor	122	10.6		2		0.0		0.0		0.2		-	Cytosol; nucleus	Chromatin silencing at silent mating-type cassette; chromatin silencing at telomere; dna replication-dependent nucleosome assembly; dna replication-independent nucleosome assembly; histone acetylation; histone exchange; histone h2b ubiquitination; nucleosome disassembly; positive regulation of histone acetylation; positive regulation of transcription elongation from rna polymerase ii promoter; re…
Atp1p	P07251	ATP1	Alpha subunit of the F1 sector of mitochondrial F1F0 ATP synthase, wh	500	421.6		28		0.1		0.1		0.7		-	Cytosol; mitochondrial intermembrane space; mitochondrial nucleoid; mitochondrial proton-transporting ATP synthase, catalytic core; mitochondrion	ATP catabolic process; ATP hydrolysis coupled proton transport; ATP synthesis coupled proton transport; proton-transporting atpase activity, rotational mechanism; proton-transporting ATP synthase activity, rotational mechanism
Atp14p	Q12349	ATP14	Subunit h of the F0 sector of mitochondrial F1F0 ATP synthase	88	9.9		2		0.0		0.1		0.3		-	Mitochondrial proton-transporting ATP synthase complex, coupling factor F(o)	ATP catabolic process; ATP synthesis coupled proton transport; cristae formation; mitochondrial proton-transporting ATP synthase complex assembly
Atp16p	Q12165	ATP16	Delta subunit of the central stalk of mitochondrial F1F0 ATP synthase	92	16.3		4		0.0		0.1		0.5		-	Mitochondrial proton-transporting ATP synthase, central stalk	ATP catabolic process; ATP synthesis coupled proton transport; proton-transporting atpase activity, rotational mechanism; proton-transporting ATP synthase activity, rotational mechanism
Atp2p	P00830	ATP2	Beta subunit of the F1 sector of mitochondrial F1F0 ATP synthase, whi	428	143.6	67.6	19	16	0.0	0.0	0.1	0.1	0.5	0.4	1.2	Cytosol; mitochondrial inner membrane; mitochondrial intermembrane space; mitochondrial proton-transporting ATP synthase, catalytic core	ATP catabolic process; ATP hydrolysis coupled proton transport; ATP synthesis coupled proton transport; proton-transporting atpase activity, rotational mechanism; proton-transporting ATP synthase activity, rotational mechanism
Atp5p	P09457	ATP5	Subunit 5 of the stator stalk of mitochondrial F1F0 ATP synthase	239	11.5		3		0.0		0.0		0.1		-	Mitochondrial proton-transporting ATP synthase, stator stalk; mitochondrial proton-transporting ATP synthase complex	ATP synthesis coupled proton transport; proton-transporting ATP synthase activity, rotational mechanism
Bat1p	P38891	BAT1	Mitochondrial branched-chain amino acid (BCAA) aminotransferase	349	125.3	7.5	14	3	0.0	0.0	0.1	0.0	0.5	0.1	5.0	Mitochondrial matrix	Branched-chain amino acid biosynthetic process; branched-chain amino acid catabolic process; branched-chain-amino-acid transaminase activity; cellular response to uv; isoleucine biosynthetic process; leucine biosynthetic process; l-isoleucine transaminase activity; l-leucine transaminase activity; l-methionine biosynthetic process from methylthioadenosine; l-valine transaminase activity; mitotic …	Superpathway of leucine, isoleucine, and valine biosynthesis; isoleucine biosynthesis; leucine biosynthesis; superpathway of methionine salvage pathway; valine degradation; isoleucine degradation; leucine degradation; methionine salvage pathway; valine biosynthesis
Bat2p	P47176	BAT2	Cytosolic branched-chain amino acid (BCAA) aminotransferase	301		4.3		2		0.0		0.0		0.1	0.0	Cytoplasm	Branched-chain amino acid biosynthetic process; branched-chain amino acid catabolic process; branched-chain-amino-acid transaminase activity; isoleucine biosynthetic process; leucine biosynthetic process; l-isoleucine transaminase activity; l-leucine transaminase activity; l-methionine biosynthetic process from methylthioadenosine; l-valine transaminase activity; valine biosynthetic process	Superpathway of leucine, isoleucine, and valine biosynthesis; isoleucine biosynthesis; leucine biosynthesis; superpathway of methionine salvage pathway; valine degradation; isoleucine degradation; leucine degradation; methionine salvage pathway; valine biosynthesis
Bgl2p	P15703	BGL2	Endo-beta-1,3-glucanase	98	50.1		8		0.1		0.2		1.0		-	Extracellular region; fungal-type cell wall	1,3-beta-glucanosyltransferase activity; carbohydrate metabolic process; fungal-type cell wall organization; glucan endo-1,3-beta-d-glucosidase activity; glucan exo-1,3-beta-glucosidase activity
Bir1p	P47134	BIR1	Subunit of chromosomal passenger complex (CPC)	1095	0.6		1		0.0		0.0		0.0		-	Chromosome passenger complex; condensed nuclear chromosome kinetochore; cytoplasm; nucleus; spindle; spindle midzone	Apoptotic process; chromosome segregation; mitotic spindle assembly checkpoint; mitotic spindle elongation; sister chromatid biorientation
Bmh1p	P29311	BMH1	14-3-3 protein, major isoform	234	26.7	4.7	6	1	0.0	0.0	0.1	0.0	0.3	0.0	6.4	Nucleus	Aggresome assembly; ascospore formation; dna damage checkpoint; fungal-type cell wall chitin biosynthetic process; glycogen metabolic process; mitotic spindle orientation checkpoint; negative regulation of apoptotic process; negative regulation of transcription from rna polymerase ii promoter; negative regulation of ubiquitin-protein ligase activity involved in mitotic cell cycle; pseudohyphal gr…
Bmh2p	P34730	BMH2	14-3-3 protein, minor isoform	230	19.6		3		0.0		0.0		0.1		-	Cytoplasm; nucleus	Ascospore formation; dna damage checkpoint; dna replication initiation; fungal-type cell wall chitin biosynthetic process; glycogen metabolic process; negative regulation of apoptotic process; negative regulation of ubiquitin-protein ligase activity involved in mitotic cell cycle; pre-replicative complex assembly involved in nuclear cell cycle dna replication; pseudohyphal growth; ras protein sig…
Ccw14p	O13547	CCW14	Covalently linked cell wall glycoprotein	72	67.6	5.7	5	2	0.1	0.0	0.2	0.1	0.8	0.3	2.7	Anchored component of membrane; extracellular region; fungal-type cell wall	Fungal-type cell wall organization
Cdc19p	P00549	CDC19	Pyruvate kinase	486	501.9	88.6	39	17	0.1	0.0	0.2	0.1	1.0	0.4	2.5	Cytoplasm	Glycolytic process; pyruvate kinase activity; pyruvate metabolic process	Glucose fermentation; glycolysis
Cit1p	P00890	CIT1	Citrate synthase	493	42.7		8		0.0		0.0		0.2		-	Cytosol; mitochondrial intermembrane space; mitochondrial matrix; mitochondrion	Acetyl-coa catabolic process; cellular carbohydrate metabolic process; citrate (si)-synthase activity; citrate metabolic process; glutamate biosynthetic process; tricarboxylic acid cycle	Superpathway of tca cycle and glyoxylate cycle; tca cycle, aerobic respiration
Cit2p	P08679	CIT2	Citrate synthase	431	1.5		1		0.0		0.0		0.0		-	Peroxisome	Citrate (si)-synthase activity; citrate metabolic process; glutamate biosynthetic process; glyoxylate cycle; tricarboxylic acid cycle	Glyoxylate cycle; superpathway of tca cycle and glyoxylate cycle
Cor1p	P07256	COR1	Core subunit of the ubiquinol-cytochrome c reductase complex	352	33.5		6		0.0		0.0		0.2		-	Mitochondrial respiratory chain complex III; mitochondrion	Aerobic respiration; catalytic activity; hydrogen ion transmembrane transport	Aerobic respiration, electron transport chain
Cox4p	P04037	COX4	Subunit IV of cytochrome c oxidase	137	20.0	4.5	3	2	0.0	0.0	0.1	0.0	0.3	0.2	1.6	Mitochondrial inner membrane; mitochondrial intermembrane space; mitochondrial respiratory chain complex IV; mitochondrion	Aerobic respiration; cytochrome-c oxidase activity; hydrogen ion transmembrane transport; mitochondrial electron transport, cytochrome c to oxygen	Aerobic respiration, electron transport chain
Cox6p	P00427	COX6	Subunit VI of cytochrome c oxidase	181	32.9	9.9	6	4	0.0	0.0	0.1	0.1	0.4	0.2	1.6	Mitochondrial respiratory chain complex IV	Cytochrome-c oxidase activity; hydrogen ion transmembrane transport; mitochondrial electron transport, cytochrome c to oxygen	Aerobic respiration, electron transport chain
Cpa2p	P03965	CPA2	Large subunit of carbamoyl phosphate synthetase	842	1.5	3.0	1	1	0.0	0.0	0.0	0.0	0.0	0.0	1.0	Carbamoyl-phosphate synthase complex	Arginine biosynthetic process; carbamoyl-phosphate synthase (glutamine-hydrolyzing) activity	Arginine biosynthesis; citrulline biosynthesis
Cpr3p	P25719	CPR3	Mitochondrial peptidyl-prolyl cis-trans isomerase (cyclophilin)	180	50.9	4.3	8	2	0.0	0.0	0.1	0.0	0.5	0.1	4.3	Mitochondrial matrix; mitochondrion	Apoptotic process; peptidyl-prolyl cis-trans isomerase activity; protein folding
Cps1p	P27614	CPS1	Vacuolar carboxypeptidase S	456		0.5		1		0.0		0.0		0.0	0.0	Fungal-type vacuole lumen; integral component of membrane; vacuolar membrane	Carboxypeptidase activity; metallocarboxypeptidase activity; nitrogen compound metabolic process; proteolysis involved in cellular protein catabolic process
Crh1p	P53301	CRH1	Chitin transglycosylase	140	16.0		3		0.0		0.1		0.2		-	Anchored component of membrane; extracellular region; fungal-type cell wall; incipient cellular bud site	Cell wall chitin metabolic process; fungal-type cell wall organization; hydrolase activity, hydrolyzing o-glycosyl compounds; transferase activity, transferring glycosyl groups
Ctf4p	Q01454	CTF4	Chromatin-associated protein	812		1.8		1		0.0		0.0		0.0	0.0	Nuclear chromosome; nuclear replication fork; nucleus; replication fork protection complex	Dna-dependent dna replication; dna repair; dna replication initiation; double-strand break repair via break-induced replication; establishment of sister chromatid cohesion; mitotic sister chromatid cohesion; replicative cell aging
Cwp1p	P28319	CWP1	Cell wall mannoprotein that localizes to daughter cell birth scars	99	5.2	9.8	2	4	0.0	0.0	0.0	0.1	0.2	0.5	0.5	Anchored component of membrane; cellular birth scar; extracellular region; fungal-type cell wall; prospore membrane	Ascospore-type prospore membrane assembly; fungal-type cell wall organization
Cyb2p	P00175	CYB2	Cytochrome b2 (L-lactate cytochrome-c oxidoreductase)	613	16.7		3		0.0		0.0		0.1		-	Cytosol; mitochondrial inner membrane; mitochondrial intermembrane space; mitochondrion; respiratory chain	Lactate metabolic process; l-lactate dehydrogenase (cytochrome) activity
Dcw1p	P36091	DCW1	Putative mannosidase	99	8.7		2		0.0		0.0		0.2		-	Anchored component of plasma membrane	Budding cell bud growth; carbohydrate catabolic process; cell wall organization; fungal-type cell wall biogenesis; mannan endo-1,6-alpha-mannosidase activity
Def1p	P35732	DEF1	RNAPII degradation factor	358	38.3	3.0	3	2	0.0	0.0	0.0	0.0	0.1	0.1	1.6	Chromosome, telomeric region; nucleus	Cellular response to dna damage stimulus; protein ubiquitination; telomere maintenance; transcription-coupled nucleotide-excision repair; ubiquitin-dependent protein catabolic process
Dpb4p	Q04603	DPB4	Subunit of DNA pol epsilon and of ISW2 chromatin accessibility complex	236		5.0		2		0.0		0.0		0.1	0.0	CHRAC; epsilon DNA polymerase complex	ATP-dependent chromatin remodeling; DNA-dependent DNA replication; DNA-directed DNA polymerase activity; error-prone translesion synthesis; heterochromatin organization involved in chromatin silencing; leading strand elongation; nucleosome mobilization; replicative senescence; transcription, DNA-templated
Dst1p	P07273	DST1	General transcription elongation factor TFIIS	413		1.6		1		0.0		0.0		0.0	0.0	Nucleus	Core rna polymerase ii recruiting transcription factor activity; maintenance of transcriptional fidelity during dna-templated transcription elongation from rna polymerase ii promoter; mrna cleavage; positive regulation of rna polymerase ii transcriptional preinitiation complex assembly; positive regulation of transcription elongation from rna polymerase ii promoter; regulation of mrna 3'-end proc…
Ecm17p	P47169	ECM17	Sulfite reductase beta subunit	1136	3.02148	10.3003	1	6	0.000880282	0.00528169	0.00202898	0.0122358	0.00987728	0.0571042		Cytoplasm; sulfite reductase complex (nadph)	Cellular amino acid biosynthetic process; cysteine biosynthetic process; hydrogen sulfide biosynthetic process; metabolic process; methionine biosynthetic process; oxidation-reduction process; sulfate assimilation; sulfur amino acid biosynthetic process	Sulfate assimilation pathway; superpathway of sulfur amino acid biosynthesis
Ecm33p	P38248	ECM33	GPI-anchored protein of unknown function	76	22.0		4		0.1		0.1		0.6		-	Anchored component of membrane; extracellular region; fungal-type cell wall; plasma membrane	Fungal-type cell wall organization
Efb1p	P32471	EFB1	Translation elongation factor 1 beta	127	93.7	20.8	7	3	0.1	0.0	0.1	0.1	0.7	0.3	2.5	Eukaryotic translation elongation factor 1 complex	Guanyl-nucleotide exchange factor activity; maintenance of translational fidelity; negative regulation of actin filament bundle assembly; positive regulation of gtpase activity; regulation of translational termination; translational elongation; translation elongation factor activity
Eft1p	P32324	EFT1	Elongation factor 2 (EF-2), also encoded by EFT2	815	13.9	28.0	4	8	0.0	0.0	0.0	0.0	0.1	0.1	0.5	Cytoplasm	Gtpase activity; gtp catabolic process; maintenance of translational fidelity; positive regulation of translational elongation; translational elongation; translation elongation factor activity
Eno1p	P00924	ENO1	Enolase I, a phosphopyruvate hydratase	433	527.8	125.4	33	27	0.1	0.1	0.2	0.2	0.9	0.7	1.3	Fungal-type vacuole; mitochondrion; phosphopyruvate hydratase complex	Gluconeogenesis; glycolytic process; phosphopyruvate hydratase activity; regulation of vacuole fusion, non-autophagic	Glucose fermentation; gluconeogenesis; glycolysis
Eno2p	P00925	ENO2	Enolase II, a phosphopyruvate hydratase	415	293.6	155.8	24	33	0.1	0.1	0.1	0.2	0.7	0.9	0.7	Cytoplasmic side of plasma membrane; fungal-type vacuole; mitochondrion; phosphopyruvate hydratase complex	Gluconeogenesis; glycolytic process; phosphopyruvate hydratase activity; regulation of vacuole fusion, non-autophagic	Glucose fermentation; gluconeogenesis; glycolysis
Esp1p	Q03018	ESP1	Separase, a caspase-like cysteine protease	1482		0.5		1		0.0		0.0		0.0	0.0	Cytoplasm; nucleus; spindle; spindle pole body	Apoptotic process; cysteine-type endopeptidase activity; mitotic sister chromatid segregation; negative regulation of protein phosphatase type 2a activity; regulation of exit from mitosis; regulation of mitotic spindle elongation
Exg1p	P23776	EXG1	Major exo-1,3-beta-glucanase of the cell wall	246	74.9	34.2	10	11	0.0	0.0	0.1	0.1	0.5	0.5	0.9	Extracellular region; fungal-type cell wall	Cellular glucan metabolic process; fungal-type cell wall organization; glucan exo-1,3-beta-glucosidase activity
Fba1p	P14540	FBA1	Fructose 1,6-bisphosphate aldolase	330	105.9	93.2	18	25	0.1	0.1	0.1	0.2	0.7	0.9	0.7	Cytosol; mitochondrion	Fructose-bisphosphate aldolase activity; gluconeogenesis; glycolytic process	Glucose fermentation; gluconeogenesis; glycolysis
Fcp1p	Q03254	FCP1	Carboxy-terminal domain (CTD) phosphatase	520		3.7		1		0.0		0.0		0.0	0.0	Cytosol; nucleus	Dephosphorylation of rna polymerase ii c-terminal domain; protein serine/threonine phosphatase activity; regulation of transcription from rna polymerase ii promoter
Fum1p	P08417	FUM1	Fumarase	403	106.3		15		0.0		0.1		0.4		-	Cytosol; mitochondrial matrix; mitochondrion; tricarboxylic acid cycle enzyme complex	Fumarate hydratase activity; fumarate metabolic process; tricarboxylic acid cycle	Superpathway of tca cycle and glyoxylate cycle; tca cycle, aerobic respiration
Gas1p	P22146	GAS1	Beta-1,3-glucanosyltransferase	179	39.3	3.0	7	1	0.0	0.0	0.1	0.0	0.5	0.1	7.6	Anchored component of membrane; cellular bud scar; ER to Golgi transport vesicle; extracellular region; fungal-type cell wall; membrane raft; nuclear periphery; plasma membrane; primary cell septum	1,3-beta-glucanosyltransferase activity; carbohydrate metabolic process; chromatin silencing; filamentous growth; fungal-type cell wall organization
Gas3p	Q03655	GAS3	Putative 1,3-beta-glucanosyltransferase	217		2.5		1		0.0		0.0		0.0	0.0	Anchored component of membrane; extracellular region; fungal-type cell wall; plasma membrane	1,3-beta-glucanosyltransferase activity; carbohydrate metabolic process; cell wall organization
Gas5p	Q08193	GAS5	1,3-beta-glucanosyltransferase	134		2.4		2		0.0		0.0		0.2	0.0	Anchored component of membrane; extracellular region; fungal-type cell wall	(1->3)-beta-d-glucan metabolic process; 1,3-beta-glucanosyltransferase activity; cell wall organization
Gbp2p	P25555	GBP2	Poly(A+) RNA-binding protein	412		16.9		7		0.0		0.0		0.2	0.0	Chromosome, telomeric region; cytoplasmic stress granule; cytosol; nucleus	Nuclear mrna surveillance; poly(a)+ mrna export from nucleus; telomere maintenance
Gcv1p	P48015	GCV1	T subunit of the mitochondrial glycine decarboxylase complex	368	48.4		7		0.0		0.0		0.2		-	Glycine cleavage complex; mitochondrion	Aminomethyltransferase activity; glycine catabolic process; glycine metabolic process; one-carbon metabolic process; oxidation-reduction process; transaminase activity
Gcv2p	P49095	GCV2	P subunit of the mitochondrial glycine decarboxylase complex	856		22.5		5		0.0		0.0		0.1	0.0	Glycine cleavage complex; mitochondrion	Glycine decarboxylation via glycine cleavage system; glycine dehydrogenase (decarboxylating) activity; one-carbon metabolic process	Folate biosynthesis; glycine cleavage complex
Gcv3p	P39726	GCV3	H subunit of the mitochondrial glycine decarboxylase complex	90	164.4		8		0.1		0.2		1.1		-	Glycine cleavage complex; mitochondrion	Glycine catabolic process; glycine decarboxylation via glycine cleavage system; one-carbon metabolic process; oxidation-reduction process; protein lipoylation	Folate biosynthesis; glycine cleavage complex
Gcy1p	P14065	GCY1	Glycerol dehydrogenase	342	82.5		10		0.0		0.1		0.3		-	Cytoplasm	Alditol:nadp+ 1-oxidoreductase activity; aldo-keto reductase (nadp) activity; arabinose catabolic process; cellular response to oxidative stress; d-xylose catabolic process; glycerol 2-dehydrogenase (nadp+) activity; glycerol dehydrogenase [nad(p)+] activity; glycerol metabolic process; oxidoreductase activity
Gdh1p	P07262	GDH1	NADP(+)-dependent glutamate dehydrogenase	351		19.8		10		0.0		0.1		0.3	0.0	Nucleus	Ammonia assimilation cycle; glutamate biosynthetic process; glutamate dehydrogenase (nadp+) activity	Glutamate biosynthesis from ammonia; superpathway of glutamate biosynthesis
Glk1p	P17709	GLK1	Glucokinase	446	8.1		4		0.0		0.0		0.1		-		Glucokinase activity; glucose 6-phosphate metabolic process; glucose import; glucose metabolic process; glycolytic process; mannose metabolic process	Glucose fermentation; mannose degradation; glucose-6-phosphate biosynthesis
Glr1p	P41921	GLR1	Cytosolic and mitochondrial glutathione oxidoreductase	525		2.02534		1		0.00190476		0.00439551		0.0205137		Cytoplasm; cytosol; mitochondrion; nucleus	Cell redox homeostasis; cellular response to oxidative stress; glutathione metabolic process; oxidation-reduction process; protein glutathionylation	Glutathione-glutaredoxin redox reactions; glutathione-glutaredoxin system
Gpd1p	Q00055	GPD1	NAD-dependent glycerol-3-phosphate dehydrogenase	276		13.3		5		0.0		0.0		0.2	0.0	Cytosol; glycerol-3-phosphate dehydrogenase complex; nucleus; peroxisome	Carbohydrate metabolic process; glycerol-3-phosphate catabolic process; glycerol-3-phosphate dehydrogenase [nad+] activity; intracellular accumulation of glycerol; nadh oxidation	Glycerol biosynthesis; phosphatidate biosynthesis ii (the glycerol-3-phosphate pathway); superpathway of phosphatidate biosynthesis; folate biosynthesis; glycine cleavage complex
Gpm1p	P00950	GPM1	Tetrameric phosphoglycerate mutase	274	77.5	22.5	9	7	0.0	0.0	0.1	0.1	0.4	0.3	1.4	Cytosol; mitochondrial intermembrane space; mitochondrion	Gluconeogenesis; glycolytic process; phosphoglycerate mutase activity	Glucose fermentation; gluconeogenesis; glycolysis
Gre3p	P38715	GRE3	Aldose reductase	355	8.4		2		0.0		0.0		0.1		-	Cytoplasm; nucleus	Alditol:nadp+ 1-oxidoreductase activity; arabinose catabolic process; cellular response to osmotic stress; cellular response to oxidative stress; d-xylose:nadp reductase activity; d-xylose catabolic process; galactose catabolic process	Xylose metabolism
Grx1p	P25373	GRX1	Glutathione-dependent disulfide oxidoreductase	89	1.62508	14.5981	1	5	0.011236	0.0561798	0.0262093	0.138098	0.12759	0.644501		Cytoplasm; nucleus	Cell redox homeostasis; cellular response to oxidative stress; oxidation-reduction process; protein glutathionylation	Glutathione-glutaredoxin system
Grx3p	Q03835	GRX3	Glutathione-dependent oxidoreductase	166		6.30939		3		0.0180723		0.0424909		0.198304		Cytosol; nucleus	Actin cytoskeleton organization; cell redox homeostasis; cellular iron ion homeostasis; cellular response to oxidative stress; negative regulation of transcription regulatory region DNA binding; oxidation-reduction process	Glutathione-glutaredoxin system
Grx4p	P32642	GRX4	Glutathione-dependent oxidoreductase	176		2.32057		1		0.00568182		0.0131688		0.0614586		Nucleus	Actin cytoskeleton organization; cell redox homeostasis; cellular iron ion homeostasis; cellular response to oxidative stress; negative regulation of transcription regulatory region DNA binding; oxidation-reduction process	Glutathione-glutaredoxin system
Grx5p	Q02784	GRX5	Glutathione-dependent oxidoreductase	116		10.537		3		0.0258621		0.0613584		0.286358		Mitochondrial matrix; mitochondrion	Cell redox homeostasis; cellular response to oxidative stress; iron-sulfur cluster assembly; oxidation-reduction process; response to osmotic stress	Glutathione-glutaredoxin system
Gsc2p	P40989	GSC2	Catalytic subunit of 1,3-beta-glucan synthase	1362		0.5		1		0.0		0.0		0.0	0.0
His3p	P06633	HIS3	Imidazoleglycerol-phosphate dehydratase	221		1.94251		1		0.00452489		0.0104734		0.0488791		Cellular_component	Cellular amino acid biosynthetic process; histidine biosynthetic process	Histidine biosynthesis; superpathway of histidine, purine, and pyrimidine biosynthesis
His4p	P00815	HIS4	Multifunctional enzyme containing phosphoribosyl-ATP pyrophosphatase	622		23.8627		9		0.0144695		0.0338784		0.15811		Cytoplasm	Cellular amino acid biosynthetic process; histidine biosynthetic process; metabolic process; oxidation-reduction process	Histidine biosynthesis; superpathway of histidine, purine, and pyrimidine biosynthesis
His7p	P33734	HIS7	Imidazole glycerol phosphate synthase	522		5.96679		3		0.00574713		0.0133212		0.0621697		Cytoplasm; intracellular	Cellular amino acid biosynthetic process; glutamine metabolic process; histidine biosynthetic process; metabolic process	Histidine biosynthesis; superpathway of histidine, purine, and pyrimidine biosynthesis
Hom2p	P13663	HOM2	Aspartic beta semi-aldehyde dehydrogenase	350	20.3		5		0.0		0.0		0.2		-	Cytoplasm	Aspartate metabolic process; aspartate-semialdehyde dehydrogenase activity; homoserine biosynthetic process; isoleucine biosynthetic process; lysine biosynthetic process via diaminopimelate; methionine biosynthetic process; n-acetyl-gamma-glutamyl-phosphate reductase activity; threonine biosynthetic process	Homoserine biosynthesis; superpathway of threonine and methionine biosynthesis; superpathway of threonine biosynthesis; superpathway of methionine biosynthesis; superpathway of sulfur amino acid biosynthesis; threonine biosynthesis
Hom6p	P31116	HOM6	Homoserine dehydrogenase (L-homoserine:NADP oxidoreductase)	295	59.9	3.6	10	1	0.0	0.0	0.1	0.0	0.4	0.0	10.8		Homoserine biosynthetic process; homoserine dehydrogenase activity; isoleucine biosynthetic process; methionine biosynthetic process; threonine biosynthetic process	Homoserine biosynthesis; superpathway of threonine and methionine biosynthesis; superpathway of threonine biosynthesis; superpathway of methionine biosynthesis; superpathway of sulfur amino acid biosynthesis; threonine biosynthesis
Hsc82p	P15108	HSC82	Cytoplasmic chaperone of the Hsp90 family	694	25.4	23.9	9	9	0.0	0.0	0.0	0.0	0.1	0.1	1.0	Mitochondrion	'De novo' protein folding; atpase activity; atpase activity, coupled; atp catabolic process; box c/d snornp assembly; cellular response to heat; proteasome assembly; protein folding; protein refolding; telomere maintenance
Hsp10p	P38910	HSP10	Mitochondrial co-chaperonin that inhibits Hsp60p ATPase activity	96	90.0	12.3	4	2	0.0	0.0	0.1	0.0	0.5	0.2	2.1	Mitochondrial matrix	Chaperone-mediated protein complex assembly; protein folding; protein import into mitochondrial intermembrane space; protein refolding
Hsp104p	P31539	HSP104	Disaggregase	964	12.9		5		0.0		0.0		0.1		-	Cytoplasm; nucleus; TRC complex	Atpase activity, coupled; ATP catabolic process; cellular heat acclimation; chaperone cofactor-dependent protein refolding; inheritance of oxidatively modified proteins involved in replicative cell aging; protein folding in endoplasmic reticulum; protein unfolding; stress granule disassembly; trehalose metabolism in response to heat stress
Hsp150p	P32478	HSP150	O-mannosylated heat shock protein	70		3.9		2		0.0		0.1		0.3	0.0	Cellular bud scar; extracellular region; fungal-type cell wall	Atpase activity; atp catabolic process; fungal-type cell wall organization
Hsp60p	P19882	HSP60	Tetradecameric mitochondrial chaperonin	524	109.6	95.9	20	26	0.0	0.0	0.1	0.1	0.4	0.6	0.8	Cytosol; mitochondrial inner membrane; mitochondrial intermembrane space; mitochondrial matrix; mitochondrial nucleoid; mitochondrion	'De novo' protein folding; atpase activity; atp catabolic process; chaperone-mediated protein complex assembly; protein import into mitochondrial intermembrane space; protein maturation; protein refolding; protein stabilization
Hsp78p	P33416	HSP78	Oligomeric mitochondrial matrix chaperone	1077	11.9		3		0.0		0.0		0.0		-	Mitochondrial matrix	Atpase activity; atp catabolic process; cellular response to heat; mitochondrial genome maintenance; protein refolding; protein stabilization; protein unfolding
Hsp82p	P02829	HSP82	Hsp90 chaperone	715	20.6		8		0.0		0.0		0.1		-	Cytoplasm	'De novo' protein folding; atpase activity, coupled; atp catabolic process; box c/d snornp assembly; positive regulation of telomere maintenance via telomerase; proteasome assembly; protein refolding; protein targeting to mitochondrion; response to osmotic stress
Hxk1p	P04806	HXK1	Hexokinase isoenzyme 1	432	7.4		5		0.0		0.0		0.1		-	Cytoplasm; mitochondrion	Carbohydrate phosphorylation; fructose import; fructose metabolic process; glucose import; glucose metabolic process; glycolytic process; hexokinase activity; mannose metabolic process	Glucose fermentation; fructose degradation; mannose degradation; glucose-6-phosphate biosynthesis
Hxk2p	P04807	HXK2	Hexokinase isoenzyme 2	370		40.1		15		0.0		0.1		0.5	0.0	Cytosol; mitochondrion; nucleus	Carbohydrate phosphorylation; fructose import; fructose metabolic process; glucose import; glucose metabolic process; glycolytic process; hexokinase activity; mannose metabolic process; regulation of transcription by glucose; replicative cell aging	Glucose fermentation; fructose degradation; mannose degradation; glucose-6-phosphate biosynthesis
Hyp2p	P23301	HYP2	Translation elongation factor eIF-5A	130	696.9	2.3	14	1	0.1	0.0	0.3	0.0	1.4	0.1	16.4	Cytosolic ribosome	Peptidyl-lysine modification to peptidyl-hypusine; positive regulation of cytoplasmic translational elongation through polyproline stretches; positive regulation of translational elongation; positive regulation of translational initiation; positive regulation of translational termination; translational frameshifting; translational initiation; translation elongation factor activity; translation in…
Hyr1p	P40581	HYR1	Thiol peroxidase	157	20.2		3		0.0		0.0		0.2		-	Intracellular; mitochondrial intermembrane space; peroxisomal matrix	Cellular response to oxidative stress; glutathione peroxidase activity; peroxiredoxin activity; phospholipid-hydroperoxide glutathione peroxidase activity	Glutathione-glutaredoxin redox reactions
Idh1p	P28834	IDH1	Subunit of mitochondrial NAD(+)-dependent isocitrate dehydrogenase	343	25.3		6		0.0		0.0		0.2		-	Cytosol; mitochondrial intermembrane space; mitochondrial isocitrate dehydrogenase complex (NAD+); mitochondrial matrix; mitochondrial nucleoid	Glutamate biosynthetic process; isocitrate dehydrogenase (NAD+) activity; isocitrate metabolic process; tricarboxylic acid cycle	Superpathway of tca cycle and glyoxylate cycle; tca cycle, aerobic respiration
Idh2p	P28241	IDH2	Subunit of mitochondrial NAD(+)-dependent isocitrate dehydrogenase	269	45.4		5		0.0		0.0		0.2		-	Mitochondrial isocitrate dehydrogenase complex (NAD+); mitochondrion	Glutamate biosynthetic process; isocitrate dehydrogenase (NAD+) activity; isocitrate metabolic process; tricarboxylic acid cycle	Superpathway of tca cycle and glyoxylate cycle; tca cycle, aerobic respiration
Idp3p	P53982	IDP3	Peroxisomal NADP-dependent isocitrate dehydrogenase	544	5.5		2		0.0		0.0		0.0		-	Cytoplasm; peroxisome	Fatty acid beta-oxidation; glyoxylate cycle; isocitrate dehydrogenase (nadp+) activity; isocitrate metabolic process; nadph regeneration; tricarboxylic acid cycle	Superpathway of glutamate biosynthesis
Iki3p	Q06706	IKI3	Subunit of Elongator complex	994		1.6		1		0.0		0.0		0.0	0.0	Cytoplasm; Elongator holoenzyme complex; nucleoplasm; nucleus	Protein transport; regulation of transcription from RNA polymerase II promoter; transcription, DNA-templated; trna wobble uridine modification
Ilv2p	P07342	ILV2	Acetolactate synthase	562		3.1		2		0.0		0.0		0.0	0.0	Acetolactate synthase complex; mitochondrion	Acetolactate synthase activity; branched-chain amino acid biosynthetic process; isoleucine biosynthetic process; valine biosynthetic process	Superpathway of leucine, isoleucine, and valine biosynthesis; isoleucine biosynthesis; acetoin biosynthesis; superpathway of acetoin and butanediol biosynthesis; valine biosynthesis
Ilv3p	P39522	ILV3	Dihydroxyacid dehydratase	507	199.7		23		0.0		0.1		0.5		-	Mitochondrion	Branched-chain amino acid biosynthetic process; dihydroxy-acid dehydratase activity; isoleucine biosynthetic process; valine biosynthetic process	Superpathway of leucine, isoleucine, and valine biosynthesis; isoleucine biosynthesis; valine biosynthesis
Ilv5p	P06168	ILV5	Acetohydroxyacid reductoisomerase and mtDNA binding protein	418	158.4	34.3	15	10	0.0	0.0	0.1	0.1	0.4	0.3	1.6	Mitochondrial nucleoid; mitochondrion	Branched-chain amino acid biosynthetic process; isoleucine biosynthetic process; ketol-acid reductoisomerase activity; mitochondrial genome maintenance; valine biosynthetic process	Superpathway of leucine, isoleucine, and valine biosynthesis; isoleucine biosynthesis; valine biosynthesis
Ilv6p	P25605	ILV6	Regulatory subunit of acetolactate synthase	294		3.1		4		0.0		0.0		0.1	0.0	Acetolactate synthase complex; mitochondrial nucleoid	Acetolactate synthase activity; branched-chain amino acid biosynthetic process; enzyme regulator activity; isoleucine biosynthetic process; regulation of catalytic activity; valine biosynthetic process	Superpathway of leucine, isoleucine, and valine biosynthesis; isoleucine biosynthesis; acetoin biosynthesis; superpathway of acetoin and butanediol biosynthesis; valine biosynthesis
Kex1p	P09620	KEX1	Cell death protease essential for hypochlorite-induced apoptosis	509	1.6		1		0.0		0.0		0.0		-	Integral component of membrane; trans-Golgi network	Apoptotic process; serine-type carboxypeptidase activity
Kgd1p	P20967	KGD1	Subunit of the mitochondrial alpha-ketoglutarate dehydrogenase complex	1037	31.3		7		0.0		0.0		0.1		-	Mitochondrial nucleoid; mitochondrial oxoglutarate dehydrogenase complex	2-oxoglutarate metabolic process; oxoglutarate dehydrogenase (succinyl-transferring) activity; tricarboxylic acid cycle	Superpathway of tca cycle and glyoxylate cycle; 2-ketoglutarate dehydrogenase complex; tca cycle, aerobic respiration
Kgd2p	P19262	KGD2	Dihydrolipoyl transsuccinylase	395	12.7		5		0.0		0.0		0.1		-	Mitochondrial nucleoid; mitochondrial oxoglutarate dehydrogenase complex	2-oxoglutarate metabolic process; dihydrolipoyllysine-residue succinyltransferase activity; l-lysine catabolic process to acetyl-coa via saccharopine; mitochondrial genome maintenance; tricarboxylic acid cycle	Superpathway of tca cycle and glyoxylate cycle; 2-ketoglutarate dehydrogenase complex; tca cycle, aerobic respiration
Lpd1p	P09624	LPD1	Dihydrolipoamide dehydrogenase	562	194.4		21		0.0		0.1		0.4		-	Glycine cleavage complex; mitochondrial nucleoid; mitochondrial oxoglutarate dehydrogenase complex; mitochondrial pyruvate dehydrogenase complex	2-oxoglutarate metabolic process; cell redox homeostasis; dihydrolipoyl dehydrogenase activity; glycine catabolic process; glycine dehydrogenase (decarboxylating) activity; hydrogen peroxide metabolic process; isoleucine catabolic process; leucine catabolic process; l-serine biosynthetic process; oxoglutarate dehydrogenase (succinyl-transferring) activity; pyruvate dehydrogenase activity; pyruvat…	Folate biosynthesis; glycine cleavage complex; 2-ketoglutarate dehydrogenase complex; pyruvate dehydrogenase complex; tca cycle, aerobic respiration
Lsc1p	P53598	LSC1	Alpha subunit of succinyl-CoA ligase	261	118.5	2.1	16	1	0.1	0.0	0.2	0.0	0.7	0.0	17.8	Mitochondrial nucleoid; mitochondrion	Atp citrate synthase activity; succinate-coa ligase (adp-forming) activity; succinyl-coa metabolic process; tricarboxylic acid cycle	Superpathway of tca cycle and glyoxylate cycle; tca cycle, aerobic respiration
Mca1p	Q08601	MCA1	Ca2+-dependent cysteine protease	178	5.4		2		0.0		0.0		0.1		-	Cytosol; nucleus	Apoptotic process; calcium-dependent cysteine-type endopeptidase activity; misfolded or incompletely synthesized protein catabolic process
Mcm7p	P38132	MCM7	Component of the heterohexameric MCM2-7 complex	733		0.9		1		0.0		0.0		0.0	0.0	Cytoplasm; DNA replication preinitiation complex; MCM complex; MCM core complex; nuclear pre-replicative complex; nucleoplasm; nucleus; replication fork protection complex	ATP catabolic process; chromatin silencing at silent mating-type cassette; chromatin silencing at telomere; DNA helicase activity; DNA replication initiation; DNA strand elongation involved in DNA replication; DNA unwinding involved in DNA replication; double-strand break repair via break-induced replication; nuclear cell cycle DNA replication; pre-replicative complex assembly involved in nuclear…
Mdh1p	P17505	MDH1	Mitochondrial malate dehydrogenase	314	1040.5		26		0.1		0.2		1.0		-	Mitochondrial matrix; mitochondrion	Aerobic respiration; cellular carbohydrate metabolic process; chronological cell aging; l-malate dehydrogenase activity; malate metabolic process; replicative cell aging; tricarboxylic acid cycle	Superpathway of tca cycle and glyoxylate cycle; tca cycle, aerobic respiration
Med4p	Q12343	MED4	Subunit of the RNA polymerase II mediator complex	299		4.2		2		0.0		0.0		0.1	0.0	Core mediator complex; mediator complex	Rna polymerase ii transcription cofactor activity; transcription from rna polymerase ii promoter
Met10p	P39692	MET10	Subunit alpha of assimilatory sulfite reductase	787		9.52499		4		0.00508259		0.0117719		0.0549389		Cytosol; sulfite reductase complex (nadph)	Cellular amino acid biosynthetic process; cysteine biosynthetic process; hydrogen sulfide biosynthetic process; metabolic process; methionine biosynthetic process; oxidation-reduction process; sulfate assimilation	Sulfate assimilation pathway; superpathway of sulfur amino acid biosynthesis
Met13p	P53128	MET13	Major isozyme of methylenetetrahydrofolate reductase	451		3.0		1		0.0		0.0		0.0	0.0		Methionine biosynthetic process;methylenetetrahydrofolate reductase (NAD(P)H) activity; tetrahydrofolate interconversion	Folate biosynthesis; folate polyglutamylation
Met14p	Q02196	MET14	Adenylylsulfate kinase	221		4.97513		2		0.00904977		0.0210565		0.0982702		Cytoplasm	Cellular amino acid biosynthetic process; cysteine biosynthetic process; hydrogen sulfide biosynthetic process; methionine biosynthetic process; phosphorylation; sulfate assimilation; sulfate assimilation, phosphoadenylyl sulfate reduction by phosphoadenylyl-sulfate reductase (thioredoxin); sulfur amino acid metabolic process	Sulfate assimilation pathway; superpathway of sulfur amino acid biosynthesis
Met17p	P06106	MET17	Methionine and cysteine synthase	356	1.94491	15.9605	1	7	0.00280899	0.0196629	0.0064889	0.0463161	0.0315886	0.216156		Cytoplasm; plasma membrane	Cellular amino acid biosynthetic process; cellular amino acid metabolic process; cysteine biosynthetic process; 'de novo' L-methionine biosynthetic process; metabolic process; methionine biosynthetic process; methionine metabolic process	Superpathway of threonine and methionine biosynthesis; superpathway of methionine biosynthesis; homocysteine biosynthesis; superpathway of sulfur amino acid biosynthesis
Met2p	P08465	MET2	L-homoserine-O-acetyltransferase	342	11.8379		2		0.00584795		0.0135565		0.0659943			Cytoplasm	Cellular amino acid biosynthetic process; homoserine metabolic process; methionine biosynthetic process; sulfur amino acid metabolic process	Superpathway of threonine and methionine biosynthesis; superpathway of methionine biosynthesis; homocysteine biosynthesis; superpathway of sulfur amino acid biosynthesis
Met32p	Q12041	MET32	Zinc-finger DNA-binding transcription factor	245		4.9		1		0.0		0.0		0.0	0.0	Cytoplasm; nucleus	Negative regulation of transcription from rna polymerase ii promoter; positive regulation of transcription from rna polymerase ii promoter; regulation of mitotic cell cycle; regulation of sulfur amino acid metabolic process; regulation of transcription from rna polymerase ii promoter; sequence-specific transcription regulatory region dna binding rna polymerase ii transcription factor recruiting t…
Mge1p	P38523	MGE1	Mitochondrial matrix cochaperone	307		1.6		1		0.0		0.0		0.0	0.0	Mitochondrial inner membrane; mitochondrial matrix; presequence translocase-associated import motor	Adenyl-nucleotide exchange factor activity; protein import into mitochondrial matrix; protein refolding; regulation of catalytic activity
Mmf1p	P40185	MMF1	Mitochondrial protein required for transamination of isoleucine	114	41.0		5		0.0		0.1		0.5		-	Mitochondrial matrix	Deaminase activity; isoleucine biosynthetic process; mitochondrial translation
Mrp4p	P32902	MRP4	Mitochondrial ribosomal protein of the small subunit	337	1.8		1		0.0		0.0		0.0		-	Mitochondrial small ribosomal subunit	Mitochondrial translation
Nap1p	P25293	NAP1	Protein that interacts with mitotic cyclin Clb2p	252		10.4		3		0.0		0.0		0.1	0.0	Cellular bud neck; cytoplasm; nucleus	Budding cell bud growth; enzyme activator activity; nucleosome assembly; nucleosome disassembly; positive regulation of catalytic activity; positive regulation of microtubule polymerization; positive regulation of transcription elongation from rna polymerase ii promoter; protein import into nucleus
Nha1p	Q99271	NHA1	Na+/H+ antiporter involved in sodium and potassium efflux	647	0.5		1		0.0		0.0		0.0		-	Integral component of membrane; membrane raft; plasma membrane	Cation:cation antiporter activity; cation transmembrane transport; cellular monovalent inorganic cation homeostasis; cellular potassium ion homeostasis; response to osmotic stress; sodium:proton antiporter activity; sodium ion transmembrane transport
Npc2p	Q12408	NPC2	Functional homolog of human NPC2/He1	53	23.1		4		0.1		0.2		0.9		-	Fungal-type vacuole lumen	Intracellular sterol transport
Npl6p	P32832	NPL6	Component of the RSC chromatin remodeling complex	451	1.7		1		0.0		0.0		0.0		-	RSC complex	ATP catabolic process; ATP-dependent chromatin remodeling; chromatin remodeling; nucleosome disassembly; protein import into nucleus; regulation of transcription, DNA-templated; transcription elongation from RNA polymerase II promoter
Oye2p	Q03558	OYE2	Conserved NADPH oxidoreductase containing flavin mononucleotide (FMN)	374		3.4		2		0.0		0.0		0.1	0.0		Apoptotic process; NADPH dehydrogenase activity; pentaerythritol trinitrate reductase activity; trichloro-p-hydroquinone reductive dehalogenase activity
Pbi2p	P01095	PBI2	Cytosolic inhibitor of vacuolar proteinase B (PRB1)	115	39.1		6		0.1		0.1		0.6		-
Pdb1p	P32473	PDB1	E1 beta subunit of the pyruvate dehydrogenase (PDH) complex	271	12.7	7.9	7	4	0.0	0.0	0.1	0.0	0.3	0.2	1.8	Mitochondrial nucleoid; mitochondrial pyruvate dehydrogenase complex; mitochondrion	Acetyl-coa biosynthetic process from pyruvate; glycolytic process; pyruvate dehydrogenase (acetyl-transferring) activity	Pyruvate dehydrogenase complex
Pep4p	P07267	PEP4	Vacuolar aspartyl protease (proteinase A)	199	255.8	6.9	19	3	0.1	0.0	0.2	0.0	1.2	0.2	7.3	Fungal-type vacuole; fungal-type vacuole lumen	Aspartic-type endopeptidase activity; autophagy; cellular response to starvation; microautophagy; peptidase activity; proteolysis involved in cellular protein catabolic process
Pet9p	P18239	PET9	Major ADP/ATP carrier of the mitochondrial inner membrane	275	14.5		2		0.0		0.0		0.1		-	Integral component of membrane; mitochondrial inner membrane; mitochondrion	Adp transport; aerobic respiration; anaerobic respiration; apoptotic process; atp:adp antiporter activity; atp transport; heme transport; mitochondrial transport; transmembrane transport
Pex1p	P24004	PEX1	AAA-peroxin	956	0.9		1		0.0		0.0		0.0		-	Peroxisomal membrane	Atpase activity; atpase activity, coupled; atp catabolic process; protein import into peroxisome matrix, receptor recycling
Pex19p	Q07418	PEX19	Chaperone and import receptor for newly-synthesized class I PMPs	303		3.3		1		0.0		0.0		0.0	0.0	Cytosol; endoplasmic reticulum; endoplasmic reticulum membrane; peroxisomal membrane; Pex17p-Pex14p docking complex	ER-dependent peroxisome organization; peroxisome inheritance; protein exit from endoplasmic reticulum; protein import into peroxisome membrane; protein stabilization
Pfk1p	P16861	PFK1	Alpha subunit of heterooctameric phosphofructokinase	883		2.2		1		0.0		0.0		0.0	0.0	6-phosphofructokinase complex; mitochondrial outer membrane; mitochondrion	6-phosphofructokinase activity; carbohydrate phosphorylation; fructose 6-phosphate metabolic process; glycolytic process; hydrogen ion transmembrane transport; proton transport	Glucose fermentation; glycolysis
Pgi1p	P12709	PGI1	Glycolytic enzyme phosphoglucose isomerase	440	4.4	23.1	3	8	0.0	0.0	0.0	0.0	0.1	0.2	0.4	Mitochondrion	Gluconeogenesis; glucose-6-phosphate isomerase activity; glycolytic process; pentose-phosphate shunt	Glucose fermentation; gluconeogenesis; glycolysis
Pgk1p	P00560	PGK1	3-phosphoglycerate kinase	461	620.9	49.1	33	18	0.1	0.0	0.2	0.1	0.9	0.4	2.0	Mitochondrion	Gluconeogenesis; glycolytic process; phosphoglycerate kinase activity	Glucose fermentation; gluconeogenesis; glycolysis
Pho5p	P00635	PHO5	Repressible acid phosphatase	244	3.0		2		0.0		0.0		0.1		-	Extracellular region; fungal-type cell wall	Acid phosphatase activity; cellular response to phosphate starvation; dephosphorylation; nucleoside-triphosphatase activity; nucleoside-triphosphate diphosphatase activity; phosphate-containing compound metabolic process
Plb1p	P39105	PLB1	Phospholipase B (lysophospholipase) involved in lipid metabolism	187	10.3		2		0.0		0.0		0.1		-	Anchored component of membrane; endoplasmic reticulum; periplasmic space; plasma membrane	Glycerophospholipid metabolic process; lysophospholipase activity; phosphatidylcholine acyl-chain remodeling; phospholipid catabolic process
Pma1p	P05030	PMA1	Plasma membrane H+-ATPase	499	9.4		2		0.0		0.0		0.0		-	Integral component of membrane; membrane raft; plasma membrane	Atp biosynthetic process; hydrogen-exporting atpase activity, phosphorylative mechanism; hydrogen ion transmembrane transport; proteasome storage granule assembly; proton transport; regulation of ph; transmembrane transport
Pnc1p	P53184	PNC1	Nicotinamidase that converts nicotinamide to nicotinic acid	232	4.8	2.0	3	1	0.0	0.0	0.0	0.0	0.1	0.0	3.2	Cytoplasm; nucleus; peroxisome	Chromatin silencing at rdna; chromatin silencing at telomere; nicotinamidase activity; nicotinate nucleotide salvage; replicative cell aging	NAD salvage pathway; superpathway of nad biosynthesis
Pol12p	P38121	POL12	B subunit of DNA polymerase alpha-primase complex	559		1.6		1		0.0		0.0		0.0	0.0	Alpha DNA polymerase:primase complex; nuclear envelope; nucleus	DNA biosynthetic process; DNA-directed DNA polymerase activity; DNA replication initiation; lagging strand elongation; telomere capping
Pol30p	P15873	POL30	Proliferating cell nuclear antigen (PCNA)	182	20.1	18.2	5	5	0.0	0.0	0.1	0.1	0.3	0.3	1.0	Nucleus; PCNA complex; replication fork	Chromatin silencing at silent mating-type cassette; chromatin silencing at telomere; DNA polymerase processivity factor activity; error-free translesion synthesis; establishment of mitotic sister chromatid cohesion; lagging strand elongation; leading strand elongation; maintenance of DNA trinucleotide repeats; meiotic mismatch repair; mismatch repair; mitotic cell cycle; mitotic sister chromatid …
Por1p	P04840	POR1	Mitochondrial porin (voltage-dependent anion channel)	163	25.3		4		0.0		0.1		0.3		-	Integral component of mitochondrial outer membrane; mitochondrial intermembrane space; mitochondrial outer membrane; mitochondrion; pore complex	Apoptotic process; cell redox homeostasis; dna transport; ion transport; mitochondrion organization; porin activity; voltage-gated anion channel activity
Pox1p	P13711	POX1	Fatty-acyl coenzyme A oxidase	730		0.8		1		0.0		0.0		0.0	0.0	Peroxisomal matrix	Acyl-coa dehydrogenase activity; acyl-coa oxidase activity; fatty acid beta-oxidation; fatty acid beta-oxidation using acyl-coa oxidase	Fatty acid oxidation pathway
Prb1p	P09232	PRB1	Vacuolar proteinase B (yscB)	534		1.7		1		0.0		0.0		0.0	0.0	Fungal-type vacuole; fungal-type vacuole lumen	Cellular response to starvation; protein catabolic process in the vacuole; serine-type endopeptidase activity; sporulation resulting in formation of a cellular spore
Psf1p	Q12488	PSF1	Subunit of the GINS complex	171		1.7		1		0.0		0.0		0.1	0.0	DNA replication preinitiation complex; GINS complex; replication fork protection complex	Cell cycle; DNA-dependent DNA replication; double-strand break repair via break-induced replication
Pst1p	Q12355	PST1	Cell wall protein that contains a putative GPI-attachment site	190	4.7	4.3	2	2	0.0	0.0	0.0	0.0	0.1	0.1	1.0	Anchored component of membrane; extracellular region; fungal-type cell wall; plasma membrane	Fungal-type cell wall organization
Pst2p	Q12335	PST2	Cell wall protein that contains a putative GPI-attachment site	108	17.3	11.3	5	4	0.0	0.0	0.1	0.1	0.5	0.4	1.3	Extracellular region	Negative regulation of transcription, dna-templated; oxidoreductase activity
Put2p	P07275	PUT2	Delta-1-pyrroline-5-carboxylate dehydrogenase	457	9.7		3		0.0		0.0		0.1		-	Mitochondrial inner membrane; mitochondrial matrix	1-pyrroline-5-carboxylate dehydrogenase activity; glutamate biosynthetic process; oxidoreductase activity, acting on the aldehyde or oxo group of donors, nad or nadp as acceptor; proline biosynthetic process; proline catabolic process to glutamate	Arginine degradation (aerobic); proline utilization
Pyc2p	P32327	PYC2	Pyruvate carboxylase isoform	1121		2.06229		1		0.000892061		0.00205616		0.00959603		Cytoplasm; cytosol	Gluconeogenesis; metabolic process; pyruvate metabolic process	Aspartate biosynthesis; gluconeogenesis; superpathway of threonine biosynthesis; superpathway of tca cycle and glyoxylate cycle; tca cycle, aerobic respiration
Qcr6p	P00127	QCR6	Subunit 6 of the ubiquinol cytochrome-c reductase complex	105	12.0	2.7	2	1	0.0	0.0	0.0	0.0	0.2	0.1	2.1	Mitochondrial intermembrane space; mitochondrial respiratory chain complex III	Aerobic respiration; hydrogen ion transmembrane transport; mitochondrial electron transport, ubiquinol to cytochrome c; ubiquinol-cytochrome-c reductase activity	Aerobic respiration, electron transport chain
Rap1p	P11938	RAP1	Essential DNA-binding transcription regulator that binds many loci	649		1.8		1		0.0		0.0		0.0	0.0	Cytosol; nuclear chromosome; nuclear chromosome, telomeric region; nucleus; telosome	Chromatin silencing at silent mating-type cassette; chromatin silencing at telomere; establishment of chromatin silencing at telomere; establishment of protein localization to chromatin; establishment of protein localization to telomere; negative regulation of chromatin silencing; negative regulation of transcription from rna polymerase ii promoter; positive regulation of transcription from rna p…
Rfa3p	P26755	RFA3	Subunit of heterotrimeric Replication Protein A (RPA)	72		3.1		1		0.0		0.0		0.2	0.0	Chromosome, telomeric region; condensed nuclear chromosome; DNA replication factor A complex	DNA repair; DNA replication; DNA topological change; DNA unwinding involved in DNA replication; double-strand break repair via homologous recombination; establishment of protein localization; heteroduplex formation; mitotic recombination; nucleotide-excision repair; protein ubiquitination; reciprocal meiotic recombination; telomere maintenance via recombination; telomere maintenance via telomeras…
Rfu1p	Q08003	RFU1	Protein that inhibits Doa4p deubiquitinating activity	181	1.8		1		0.0		0.0		0.1		-	Endosome	Cysteine-type endopeptidase inhibitor activity; enzyme inhibitor activity; regulation of ubiquitin homeostasis
Rnr4p	P49723	RNR4	Ribonucleotide-diphosphate reductase (RNR) small subunit	329		24.5		8		0.0		0.1		0.3	0.0	Cytoplasm; nucleus; ribonucleoside-diphosphate reductase complex	Cofactor biosynthetic process; deoxyribonucleoside diphosphate metabolic process; deoxyribonucleotide biosynthetic process; dna replication; ribonucleoside-diphosphate reductase activity, thioredoxin disulfide as acceptor	De novo biosynthesis of purine nucleotides; superpathway of histidine, purine, and pyrimidine biosynthesis; superpathway of purine biosynthesis and salvage pathways; de novo biosynthesis of pyrimidine deoxyribonucleotides
Rot1p	Q03691	ROT1	Molecular chaperone involved in protein folding in the ER	61	2.9		1		0.0		0.0		0.2		-	Endoplasmic reticulum membrane; integral component of membrane	'De novo' protein folding; budding cell apical bud growth; endoplasmic reticulum unfolded protein response; establishment or maintenance of actin cytoskeleton polarity; fungal-type cell wall biogenesis; protein folding; protein n-linked glycosylation; protein o-linked mannosylation
Rpc19p	P28000	RPC19	RNA polymerase subunit AC19	102		9.7		3		0.0		0.1		0.3	0.0	DNA-directed RNA polymerase I complex; DNA-directed RNA polymerase III complex; nucleoplasm	Ribosome biogenesis; RNA polymerase I activity; transcription from RNA polymerase I promoter; trna transcription from RNA polymerase III promoter
Rpc37p	P36121	RPC37	RNA polymerase III subunit C37	250		2.5		1		0.0		0.0		0.0	0.0	DNA-directed RNA polymerase III complex	DNA-directed RNA polymerase activity; trna transcription from RNA polymerase III promoter
Rpo26p	P20435	RPO26	RNA polymerase subunit ABC23	108		5.7		2		0.0		0.0		0.2	0.0	Cytoplasm; DNA-directed RNA polymerase I complex; DNA-directed RNA polymerase II, core complex; DNA-directed RNA polymerase III complex; nucleoplasm	Ribosome biogenesis; RNA polymerase I activity; transcription, RNA-templated; transcription from RNA polymerase III promoter; transcription from RNA polymerase II promoter; transcription from RNA polymerase I promoter; trna transcription from RNA polymerase III promoter
Rpo41p	P13433	RPO41	Mitochondrial RNA polymerase	1464		1.5		1		0.0		0.0		0.0	0.0	Mitochondrial DNA-directed RNA polymerase complex; mitochondrial matrix; mitochondrial nucleoid	DNA-directed RNA polymerase activity; mitochondrial genome maintenance; transcription from mitochondrial promoter
Rpp0p	P05317	RPP0	Conserved ribosomal protein P0 of the ribosomal stalk	172	18.4	4.7	4	3	0.0	0.0	0.1	0.0	0.3	0.2	1.4	Cytoplasm; cytosolic large ribosomal subunit	Cytoplasmic translation; ribosomal large subunit assembly; translational elongation
Rpp1Bp	P10622	RPP1B	Ribosomal protein P1 beta	22		1.5		1		0.0		0.1		0.5	0.0	Cytosolic large ribosomal subunit	Cytoplasmic translation; positive regulation of protein kinase activity; protein kinase activator activity; translational elongation
Rpp2Ap	P05319	RPP2A	Ribosomal protein P2 alpha	36	10.8	11.2	2	4	0.1	0.1	0.1	0.3	0.7	1.4	0.5	Cytosolic large ribosomal subunit	Cytoplasmic translation; positive regulation of protein kinase activity; protein kinase activator activity; translational elongation
Rpp2Bp	P02400	RPP2B	Ribosomal protein P2 beta	41	33.8	22.1	5	5	0.1	0.1	0.3	0.3	1.6	1.5	1.0	Cytosolic large ribosomal subunit	Cytoplasmic translation; positive regulation of protein kinase activity; protein kinase activator activity; translational elongation
Rps0Ap	P32905	RPS0A	Ribosomal 40S subunit protein S0A	172	20.4	10.5	4	5	0.0	0.0	0.1	0.1	0.3	0.3	0.8	Cytosolic small ribosomal subunit	Cytoplasmic translation; endonucleolytic cleavage in its1 to separate ssu-rrna from 5.8s rrna and lsu-rrna from tricistronic rrna transcript (ssu-rrna, 5.8s rrna, lsu-rrna); endonucleolytic cleavage to generate mature 3'-end of ssu-rrna from (ssu-rrna, 5.8s rrna, lsu-rrna); ribosomal small subunit assembly; rrna export from nucleus
Rps0Bp	P46654	RPS0B	Protein component of the small (40S) ribosomal subunit	172	4.9		3		0.0		0.0		0.2		-	Cytosolic small ribosomal subunit	Cytoplasmic translation; endonucleolytic cleavage in its1 to separate ssu-rrna from 5.8s rrna and lsu-rrna from tricistronic rrna transcript (ssu-rrna, 5.8s rrna, lsu-rrna); endonucleolytic cleavage to generate mature 3'-end of ssu-rrna from (ssu-rrna, 5.8s rrna, lsu-rrna); ribosomal small subunit assembly; rrna export from nucleus
Rps15p	Q01855	RPS15	Protein component of the small (40S) ribosomal subunit	160	11.0		2		0.0		0.0		0.1		-	Cytosolic small ribosomal subunit	Cytoplasmic translation; rrna export from nucleus
Rps21Ap	P0C0V8	RPS21A	Protein component of the small (40S) ribosomal subunit	93	5.7	122.6	2	16	0.0	0.2	0.1	0.5	0.2	2.3	0.1	Cytosolic small ribosomal subunit	Cytoplasmic translation; endonucleolytic cleavage in its1 to separate ssu-rrna from 5.8s rrna and lsu-rrna from tricistronic rrna transcript (ssu-rrna, 5.8s rrna, lsu-rrna); endonucleolytic cleavage to generate mature 3'-end of ssu-rrna from (ssu-rrna, 5.8s rrna, lsu-rrna)
Rps5p	P26783	RPS5	Protein component of the small (40S) ribosomal subunit	202	31.4	10.9	4	2	0.0	0.0	0.0	0.0	0.2	0.1	2.1	Cytosolic small ribosomal subunit	Cytoplasmic translation; regulation of translational fidelity; rrna export from nucleus
Rrm3p	P38766	RRM3	DNA helicase involved in rDNA replication and Ty1 transposition	879		2.2		1		0.0		0.0		0.0	0.0	Nuclear telomeric heterochromatin; replication fork	Atp-dependent 5'-3' dna helicase activity; atp-dependent dna helicase activity; dna duplex unwinding; dna helicase activity; dna repair; dna replication; g-quadruplex dna unwinding; mitochondrial genome maintenance; replication fork progression beyond termination site; telomere maintenance
Rsc2p	Q06488	RSC2	Component of the RSC chromatin remodeling complex	1019		1.6		1		0.0		0.0		0.0	0.0	RSC complex	ATP catabolic process; ATP-dependent chromatin remodeling; chromosome segregation; double-strand break repair via homologous recombination; double-strand break repair via nonhomologous end joining; nucleosome disassembly; plasmid maintenance; regulation of sporulation resulting in formation of a cellular spore; regulation of transcription, DNA-templated; sister chromatid cohesion; sporulation res…
Rsc4p	Q02206	RSC4	Component of the RSC chromatin remodeling complex	506	1.9		1		0.0		0.0		0.0		-	RSC complex	ATP catabolic process; ATP-dependent chromatin remodeling; G2/M transition of mitotic cell cycle; nucleosome disassembly; regulation of transcription, DNA-templated; transcription elongation from RNA polymerase II promoter
Rsc8p	P43609	RSC8	Component of the RSC chromatin remodeling complex	627	9.1	1.8	2	1	0.0	0.0	0.0	0.0	0.0	0.0	2.1	RSC complex	ATP catabolic process; ATP-dependent chromatin remodeling; double-strand break repair via nonhomologous end joining; G1/S transition of mitotic cell cycle; nucleosome disassembly; regulation of transcription, DNA-templated; transcription elongation from RNA polymerase II promoter
Scw10p	Q04951	SCW10	Cell wall protein with similarity to glucanases	96	29.4		6		0.1		0.2		0.8		-	Extracellular region; fungal-type cell wall	Carbohydrate metabolic process; cell wall organization; conjugation with cellular fusion; glucosidase activity
Scw11p	P53189	SCW11	Cell wall protein with similarity to glucanases	66		1.9		1		0.0		0.0		0.2	0.0	Extracellular region; fungal-type cell wall	Carbohydrate metabolic process; cell wall organization; cytokinesis, completion of separation; glucan endo-1,3-beta-d-glucosidase activity
Scw4p	P53334	SCW4	Cell wall protein with similarity to glucanases	129	59.2	6.7	8	4	0.1	0.0	0.2	0.1	0.7	0.3	2.2	Extracellular region; fungal-type cell wall; vacuole	Carbohydrate metabolic process; cell wall organization; conjugation with cellular fusion; glucosidase activity
Sdh1p	Q00711	SDH1	Flavoprotein subunit of succinate dehydrogenase	711	8.3		2		0.0		0.0		0.0		-	Mitochondrial membrane; mitochondrial respiratory chain complex II; mitochondrion	Cellular respiration; mitochondrial electron transport, succinate to ubiquinone; succinate dehydrogenase (ubiquinone) activity; tricarboxylic acid cycle	Aerobic respiration, electron transport chain; superpathway of tca cycle and glyoxylate cycle; tca cycle, aerobic respiration
Ser1p	P33330	SER1	3-phosphoserine aminotransferase	376	1.90744	15.4276	1	5	0.00265957	0.0132979	0.00614269	0.0310931	0.0299032	0.145111		Cytoplasm	Cellular amino acid biosynthetic process; L-serine biosynthetic process; purine nucleobase biosynthetic process; serine family amino acid biosynthetic process	Superpathway of serine and glycine biosynthesis; serine biosynthesis from 3-phosphoglycerate
Ser33p	P40510	SER33	3-phosphoglycerate dehydrogenase	355		8.86976		2		0.0056338		0.0130568		0.0609358		Cytoplasm	Cellular amino acid biosynthetic process; L-serine biosynthetic process; metabolic process; oxidation-reduction process; serine family amino acid biosynthetic process	Superpathway of serine and glycine biosynthesis; serine biosynthesis from 3-phosphoglycerate
Sfa1p	P32771	SFA1	Bifunctional alcohol dehydrogenase and formaldehyde dehydrogenase	349	37.4375	7.92244	5	2	0.0143266	0.00573066	0.0335385	0.0132828	0.163269	0.0619904		Cytoplasm; mitochondrion	Amino acid catabolic process to alcohol via Ehrlich pathway; ethanol oxidation; formaldehyde catabolic process; furaldehyde metabolic process; oxidation-reduction process	Formaldehyde oxidation ii (glutathione-dependent); tryptophan degradation; valine degradation; isoleucine degradation; leucine degradation; phenylalanine degradation
Sgs1p	P35187	SGS1	Nucleolar DNA helicase of the RecQ family	1431		1.5		1		0.0		0.0		0.0	0.0	Nucleolus; recq helicase-Topo III complex	ATP-dependent 3'-5' DNA helicase activity; ATP-dependent DNA helicase activity; chromosome organization; DNA double-strand break processing; DNA duplex unwinding; DNA topological change; DNA unwinding involved in DNA replication; double-strand break repair via homologous recombination; gene conversion at mating-type locus, DNA double-strand break processing; intra-S DNA damage checkpoint; meiotic…
Shm1p	P37292	SHM1	Mitochondrial serine hydroxymethyltransferase	462	48.0		7		0.0		0.0		0.2		-	Mitochondrion	Glycine hydroxymethyltransferase activity; glycine metabolic process; l-serine metabolic process; one-carbon metabolic process; serine family amino acid biosynthetic process; tetrahydrofolate interconversion	Pathways of chorismate; folate biosynthesis; glycine biosynthesis from serine; folate polyglutamylation; serine biosynthesis from glyoxylate; superpathway of serine and glycine biosynthesis
Shm2p	P37291	SHM2	Cytosolic serine hydroxymethyltransferase	493	46.1	12.1	8	4	0.0	0.0	0.0	0.0	0.2	0.1	2.1	Cytoplasm	Glycine hydroxymethyltransferase activity; glycine metabolic process; l-serine metabolic process; one-carbon metabolic process; tetrahydrofolate interconversion	Pathways of chorismate; folate biosynthesis; glycine biosynthesis from serine; folate polyglutamylation; serine biosynthesis from glyoxylate; superpathway of serine and glycine biosynthesis
Skn1p	P33336	SKN1	Protein involved in sphingolipid biosynthesis	341	8.3	1.9	2	1	0.0	0.0	0.0	0.0	0.1	0.0	2.1	Integral component of membrane	(1->6)-beta-d-glucan biosynthetic process; fungal-type cell wall organization; glucosidase activity;sphingolipid biosynthetic process
Sld5p	Q03406	SLD5	Subunit of the GINS complex	218		2.1		1		0.0		0.0		0.0	0.0	DNA replication preinitiation complex; GINS complex; replication fork protection complex	DNA-dependent DNA replication; double-strand break repair via break-induced replication
Spt16p	P32558	SPT16	Subunit of the heterodimeric FACT complex (Spt16p-Pob3p)	920		4.9		2		0.0		0.0		0.0	0.0	FACT complex; nuclear chromatin; replication fork protection complex; transcription elongation factor complex	DNA-dependent DNA replication; DNA repair; DNA replication-independent nucleosome organization; nucleosome assembly; positive regulation of RNA polymerase II transcriptional preinitiation complex assembly; positive regulation of transcription initiation from RNA polymerase II promoter; regulation of transcription by chromatin organization; transcription elongation from RNA polymerase II promoter
Srv2p	P17555	SRV2	CAP (cyclase-associated protein)	374	2.5		1		0.0		0.0		0.0		-	Actin cortical patch	Actin filament organization; actin filament severing; cell morphogenesis; ras protein signal transduction
Ssa1p	P10591	SSA1	ATPase involved in protein folding and NLS-directed nuclear transport	554	327.5	319.8	54	61	0.1	0.1	0.3	0.3	1.2	1.3	0.9	Cytoplasm; extracellular region; fungal-type cell wall; fungal-type vacuole membrane; nucleus; polysome	Atpase activity; atp catabolic process; clathrin coat disassembly; cytoplasmic translation; protein folding; protein import into nucleus, translocation; protein refolding; protein targeting to mitochondrion; srp-dependent cotranslational protein targeting to membrane, translocation; stress granule disassembly
Ssa2p	P10592	SSA2	ATP binding protein involved in protein folding and vacuolar import o	545	299.5	431.2	51	69	0.1	0.1	0.2	0.3	1.2	1.6	0.7	Cytoplasm; cytosol; extracellular region; fungal-type cell wall; fungal-type vacuole membrane; mitochondrion; polysome	Atpase activity; atp catabolic process; protein folding; srp-dependent cotranslational protein targeting to membrane, translocation
Ssc1p	P12398	SSC1	Hsp70 family ATPase	590	84.3	19.0	24	9	0.0	0.0	0.1	0.0	0.5	0.2	2.9
Sse1p	P32589	SSE1	ATPase component of the heat shock protein Hsp90 chaperone complex	702	100.7	33.1	19	12	0.0	0.0	0.1	0.0	0.3	0.2	1.7	Cytoplasm; polysome	Adenyl-nucleotide exchange factor activity; protein folding; protein refolding; regulation of catalytic activity
Ssn2p	P38931	SSN2	Subunit of the RNA polymerase II mediator complex	1112		0.8		1		0.0		0.0		0.0	0.0	Mediator complex	Negative regulation of transcription from rna polymerase ii promoter; positive regulation of transcription from rna polymerase ii promoter; positive regulation of transcription from rna polymerase ii promoter by galactose; rna polymerase ii transcription coactivator activity; rna polymerase ii transcription factor recruiting transcription factor activity; transcription from rna polymerase ii prom…
Std1p	Q02794	STD1	Protein involved in control of glucose-regulated gene expression	333		0.4		1		0.0		0.0		0.0	0.0	Nucleus; plasma membrane	Glucose metabolic process; nicotinamide riboside biosynthetic process; nicotinic acid riboside biosynthetic process; positive regulation of protein kinase activity; protein kinase activator activity; regulation of transcription from rna polymerase ii promoter; response to salt stress; signal transduction; transcription, dna-templated
Stm1p	P39015	STM1	Protein required for optimal translation under nutrient stress	289	61.8	5.1	6	2	0.0	0.0	0.0	0.0	0.2	0.1	3.2	Cytoplasm; nucleus; perinuclear region of cytoplasm; polysome	Negative regulation of apoptotic process; regulation of translational initiation in response to stress; telomere maintenance; tor signaling; translational elongation
Sub2p	Q07478	SUB2	Component of the TREX complex required for nuclear mRNA export	471		2.7		2		0.0		0.0		0.0	0.0	Chromosome, telomeric region; spliceosomal complex; transcription export complex	Atp catabolic process; atp-dependent rna helicase activity; chromatin silencing at telomere; mrna 3'-end processing; mrna export from nucleus; mrna splicing, via spliceosome; transcription-coupled nucleotide-excision repair; transcription elongation from rna polymerase ii promoter
Suc2p	P00724	SUC2	Invertase	190	124.3		15		0.1		0.2		1.0		-	Cytoplasm; extracellular region	Beta-fructofuranosidase activity; fructan catabolic process; inulinase activity; inulin catabolic process; raffinose catabolic process; sucrose alpha-glucosidase activity; sucrose catabolic process	Sucrose degradation
Tdh1p	P00360	TDH1	Glyceraldehyde-3-phosphate dehydrogenase, isozyme 1	335	516.2	8.5	12	3	0.0	0.0	0.1	0.0	0.4	0.1	4.3	Cytoplasm; fungal-type cell wall; lipid particle; mitochondrion	Gluconeogenesis; glyceraldehyde-3-phosphate dehydrogenase (nad+) (phosphorylating) activity; glycolytic process	Glucose fermentation; gluconeogenesis; glycolysis
Tdh2p	P00358	TDH2	Glyceraldehyde-3-phosphate dehydrogenase, isozyme 2	299	687.3	23.0	18	7	0.1	0.0	0.1	0.1	0.7	0.3	2.8	Cytoplasm; fungal-type cell wall; lipid particle; mitochondrion	Apoptotic process; gluconeogenesis; glyceraldehyde-3-phosphate dehydrogenase (nad+) (phosphorylating) activity; glycolytic process; reactive oxygen species metabolic process	Glucose fermentation; gluconeogenesis; glycolysis
Tdh3p	P00359	TDH3	Glyceraldehyde-3-phosphate dehydrogenase, isozyme 3	300	860.1	130.6	24	26	0.1	0.1	0.2	0.2	1.0	1.0	1.0	Cytoplasm; fungal-type cell wall; lipid particle; mitochondrion	Apoptotic process; gluconeogenesis; glyceraldehyde-3-phosphate dehydrogenase (nad+) (phosphorylating) activity; glycolytic process; reactive oxygen species metabolic process	Glucose fermentation; gluconeogenesis; glycolysis
Tef1p	P02994	TEF1	Translational elongation factor EF-1 alpha	504	39.0	4.3	5	2	0.0	0.0	0.0	0.0	0.1	0.0	2.6	Cytoplasm; cytoskeleton; eukaryotic translation elongation factor 1 complex; mitochondrion; ribosome	Gtpase activity; translational elongation; translation elongation factor activity; trna export from nucleus
Tef4p	P36008	TEF4	Gamma subunit of translational elongation factor eEF1B	376	25.4		5		0.0		0.0		0.2		-	Cytoplasmic stress granule; eukaryotic translation elongation factor 1 complex; ribosome	Translational elongation; translation elongation factor activity
Tfs1p	P14306	TFS1	Protein that interacts with and inhibits carboxypeptidase Y and Ira2p	179	6.3		4		0.0		0.1		0.3		-	Cytoplasm; fungal-type vacuole lumen; fungal-type vacuole membrane	Peptidase inhibitor activity; regulation of proteolysis; regulation of ras protein signal transduction; serine-type endopeptidase inhibitor activity
Thi3p	Q07471	THI3	Regulatory protein that binds Pdc2p and Thi2p transcription factors	412	2.87779		2		0.00485437		0.0112403		0.0547189			Nucleus	Amino acid catabolic process via Ehrlich pathway; branched-chain amino acid catabolic process; positive regulation of thiamine biosynthetic process; positive regulation of transcription from RNA polymerase II promoter	Isoleucine degradation; leucine degradation
Thr4p	P16120	THR4	Threonine synthase	432		1.74513		2		0.00462963		0.0107171		0.0500166		Cytoplasm; nucleus	Cellular amino acid biosynthetic process; cellular amino acid metabolic process; threonine biosynthetic process	Superpathway of threonine and methionine biosynthesis; superpathway of threonine biosynthesis; threonine biosynthesis
Tos1p	P38288	TOS1	Covalently-bound cell wall protein of unknown function	125	10.1		2		0.0		0.0		0.2		-	Extracellular region; fungal-type cell wall
Tpi1p	P00942	TPI1	Triose phosphate isomerase, abundant glycolytic enzyme	211	16.6	10.8	4	4	0.0	0.0	0.0	0.0	0.2	0.2	1.0	Mitochondrion	Gluconeogenesis; glycolytic process; pentose-phosphate shunt; triose-phosphate isomerase activity	Glucose fermentation; glycolysis
Trp2p	P00899	TRP2	Anthranilate synthase	444		4.36792		3		0.00675676		0.0156797		0.0731766		Anthranilate synthase complex; cytoplasm	Aromatic amino acid family biosynthetic process; biosynthetic process; cellular amino acid biosynthetic process; tryptophan biosynthetic process	Pathways of chorismate; superpathway of phenylalanine, tyrosine and tryptophan biosynthesis; tryptophan biosynthesis
Trr1p	P29509	TRR1	Cytoplasmic thioredoxin reductase	226		5.90894		3		0.0132743		0.0310372		0.14485		Cytoplasm; cytosol; mitochondrial intermembrane space; mitochondrion	Cell redox homeostasis; cellular response to oxidative stress; oxidation-reduction process; removal of superoxide radicals	Thioredoxin system
Trx1p	P22217	TRX1	Cytoplasmic thioredoxin isoenzyme	62	2.25537	57.0457	1	8	0.016129	0.129032	0.0378367	0.34596	0.184193	1.61459		Cytoplasm; cytosol; fungal-type vacuole; golgi apparatus; golgi membrane; membrane; mitochondrial intermembrane space; mitochondrion; nucleus	Cell redox homeostasis; cellular response to oxidative stress; deoxyribonucleotide biosynthetic process; ER to Golgi vesicle-mediated transport; glycerol ether metabolic process; oxidation-reduction process; protein deglutathionylation; protein folding; protein transport; retrograde vesicle-mediated transport, Golgi to ER; sulfate assimilation; vacuole fusion, non-autophagic; vacuole inheritance	Thioredoxin system
Trx2p	P22803	TRX2	Cytoplasmic thioredoxin isoenzyme	63	23.0689	98.0817	5	10	0.0793651	0.15873	0.200508	0.44122	0.976094	2.05916		Cytoplasm; cytosol; fungal-type vacuole; golgi apparatus; golgi membrane; membrane; nucleus	Cell redox homeostasis; cellular response to oxidative stress; deoxyribonucleotide biosynthetic process; ER to Golgi vesicle-mediated transport; glutathione metabolic process; glycerol ether metabolic process; oxidation-reduction process; protein deglutathionylation; protein folding; protein transport; retrograde vesicle-mediated transport, Golgi to ER; sulfate assimilation; vacuole fusion, non-a…	Thioredoxin system
Tuf1p	P02992	TUF1	Mitochondrial translation elongation factor Tu	451	34.6		5		0.0		0.0		0.1		-	Mitochondrial matrix	Gtpase activity; gtp catabolic process; mitochondrial translation; mitochondrial translational elongation; translation elongation factor activity
Uth1p	P36135	UTH1	Protein involved in cell wall biogenesis	68		1.6		1		0.0		0.0		0.2	0.0	Cell wall; extracellular region; extrinsic component of mitochondrial inner membrane; mitochondrial outer membrane	Barrier septum assembly; cell wall organization; fungal-type cell wall biogenesis; hydrolase activity, acting on glycosyl bonds; mitochondrion degradation; negative regulation of chromatin silencing involved in replicative cell aging; polysaccharide catabolic process
Ydj1p	P25491	YDJ1	Type I HSP40 co-chaperone	442	4.0		2		0.0		0.0		0.1		-	Cytosol; perinuclear region of cytoplasm; TRC complex	'De novo' protein folding; atpase activator activity; ER-associated ubiquitin-dependent protein catabolic process; positive regulation of atpase activity; protein refolding; protein targeting to ER; protein targeting to mitochondrion; response to heat
Yef3p	P16521	YEF3	Gamma subunit of translational elongation factor eEF1B	907		53.2		19		0.0		0.0		0.2	0.0	Cytoplasmic stress granule; cytosolic ribosome; ribosome	Atpase activity; atp catabolic process; translational elongation; translational termination; translation elongation factor activity
Yer069wp	Q01217	YER069W	Acetylglutamate kinase and N-acetyl-gamma-glutamyl-phosphate reductase	784	81.7		13		0.0		0.0		0.2		-	Mitochondrial matrix	Acetylglutamate kinase activity; arginine biosynthetic process; n-acetyl-gamma-glutamyl-phosphate reductase activity; ornithine biosynthetic process; regulation of transcription, dna-templated	Arginine biosynthesis
Ygp1p	P38616	YGP1	Cell wall-related secretory glycoprotein	89	94.9		8		0.1		0.2		1.1		-	Extracellular region	Cellular amino acid metabolic process; cell wall assembly
Yil082w-Ap	Q7LHG5	YIL082W-A	Retrotransposon TYA Gag and TYB Pol genes	1716		1.6		1		0.0		0.0		0.0	0.0	Cytoplasm; nucleus; retrotransposon nucleocapsid	Aspartic-type endopeptidase activity; dna biosynthetic process; dna-directed dna polymerase activity; dna integration; dna recombination; peptidase activity; ribonuclease activity; rna-dependent dna replication; rna-directed dna polymerase activity; rna-dna hybrid ribonuclease activity; rna phosphodiester bond hydrolysis; transposition, rna-mediated; viral release from host cell
YJL171C	P46992	YJL171C	GPI-anchored cell wall protein of unknown function	118	32.6		5		0.0		0.1		0.5		-	Anchored component of membrane; fungal-type cell wall; plasma membrane
Ylr278cp	Q05854	YLR278C	Zinc-cluster protein	984		0.4		1		0.0		0.0		0.0	0.0	Nucleus	Sequence-specific dna binding rna polymerase ii transcription factor activity
YLR446W	Q06204	YLR446W	Putative hexokinase	228	1.0		1		0.0		0.0		0.0		-		Glycolytic process; hexokinase activity
Ymr074cp	Q04773	YMR074C	Protein with homology to human PDCD5	123		3.1		1		0.0		0.0		0.1	0.0		Apoptotic process
YMR315W	Q04869	YMR315W	Protein with NADP(H) oxidoreductase activity	351	13.2		3		0.0		0.0		0.1		-		NADPH regeneration; oxidoreductase activity
YNL190W	P53872	YNL190W	Hydrophilin essential in dessication-rehydration process	240	2.2		1		0.0		0.0		0.0		-	Anchored component of membrane; extracellular region; fungal-type cell wall	Cellular response to water deprivation
YOR389W	Q08912	YOR389W	Putative protein of unknown function	456	1.5		1		0.0		0.0		0.0		-	Extracellular region
Ypr1p	Q12458	YPR1	NADPH-dependent aldo-keto reductase	308	162.1	9.9	14	3	0.0	0.0	0.1	0.0	0.5	0.1	5.1	Cytoplasm	Alditol:nadp+ 1-oxidoreductase activity; arabinose catabolic process; carbonyl reductase (nadph) activity; cellular response to oxidative stress; d-xylose catabolic process
Zwf1p	P11412	ZWF1	Glucose-6-phosphate dehydrogenase (G6PD)	574		3.4		1		0.0		0.0		0.0	0.0		Glucose-6-phosphate dehydrogenase activity; NADPH regeneration; pentose-phosphate shunt, oxidative branch; response to hydrogen peroxide	Oxidative branch of the pentose phosphate pathway; pentose phosphate pathway
